# Supplementary material for: The potential of preoperative three-dimensional computed tomography for para-aortic lymphadenectomy in gynecological malignancies
Source: Research Square preprint supplement (doi:10.21203/rs.3.rs-5872015/v1), 2025-02-03
Supplement: Supplementary file 1 [file 15c35114b1effee2b7280c3d.docx]

| Table 3. Surgical outcomes including complications between two groups | | | | |  |  |  |
| --- | --- | --- | --- | --- | --- | --- | --- |
|  |  |  | non-3DCT group (N=38) | | 3DCT group (N=34) | | P- value |
| *Blood loss, ml （range） | | | 464 | (5-3582) | 510 | (24-2540) | 0.381 |
| *Operative times (range) | |  | 316 | (237-477) | 333 | (251-665) | 0.259 |
| Number of resected lymph nodes | | |  |  |  |  |  |
|  | Para-aorta |  | 16 | (6-45) | 16 | (8-31) | 0.597 |
|  | Pelvis |  | 36 | (9-45) | 28 | (16-60) | 0.166 |
| Intraoperative complications | | |  |  |  |  |  |
|  |  |  | Mild active bleeding from the vena cava : 2 case | |  |  |  |
| Postoperative complications | | |  |  |  |  |  |
|  |  |  | Lymphatic cyst infection, G3: 2 cases | |  |  |  |
|  |  |  | Chylous leakage, G2: 3 cases | | Chylous leakage, G2: a case | |  |
|  |  |  | Intestinal obstruction, G2: a case | |  | | |
|  |  |  |  |  | Defect of contrast effect in the lower pole of the kidney: a case | |  |
| *All data were indicated in median value. Abbreviation: 3DCT, three-dimensional computed tomography | | | | | | | |
