# Supplementary material for: The potential of preoperative three-dimensional computed tomography for para-aortic lymphadenectomy in gynecological malignancies
Source: Research Square preprint supplement (doi:10.21203/rs.3.rs-5872015/v1), 2025-02-03
Supplement: Supplementary file 2 [file 4c043f45edd07018db179f39.docx]

| Table 4. The presence of the *renal artery caudal to the lower edge of the renal vein | | |  |
| --- | --- | --- | --- |
|  | Patients with not having accessory renal artery | Patients with having accessory renal artery | P- value |
| *Renal artery present caudal to the lower edge of the renal vein |  |  | 0.702 |
| No | 15 (78.9%) | 11 (73.3%) |  |
| Yes | †4 (21.1%) | 4 (26.7%) |  |
| * Including unilateral, bilateral renal artery and accessory renal artery, †Two patients had unilateral, and two had bilateral involvement. | | | |
