# Supplementary material for: The potential of preoperative three-dimensional computed tomography for para-aortic lymphadenectomy in gynecological malignancies
Source: Research Square preprint supplement (doi:10.21203/rs.3.rs-5872015/v1), 2025-02-03
Supplement: Supplementary file 3 [file 8b9d6962dc76696a6324551a.docx]

| Table 1. Clinical characteristics of the study include 72 patients in para-aortic lymphadenectomy | | | | | |  |  |
| --- | --- | --- | --- | --- | --- | --- | --- |
|  |  |  | non-3DCT group (N=38) | | 3DCT group (N=34) | | P- value |
| *Age, years (range) | |  | 58 | (35-78) | 57 | (29-77) | 0.609 |
| *Height, cm (range) | |  | 154.4 | (140.2-165.7) | 154.5 | (146.3-170.9) | 0.153 |
| *Body weight, kg (range) | |  | 55.7 | (38.5-75.2) | 50 | (37.8-81.6) | 0.569 |
| * BMI (range) | |  | 23.6 | (16.8-34.7) | 20.9 | (15.9-33.8) | 0.494 |
| Disease |  |  |  |  |  |  | 0.702 |
|  | †Endometrial cancer | | 27 | (71.1%) | 21 | (61.8%) |  |
|  | ‡Ovarian cancer | | 7 | (18.4%) | 8 | (23.5%) |  |
|  | §Cervical cancer |  | 4 | (10.5%) | 5 | (14.7%) |  |
| Stage |  |  |  |  |  |  | 0.738 |
|  | Ⅰ- Ⅱ |  | 26 | (68.5%) | 22 | (64.7%) |  |
|  | Ⅲ - Ⅳ |  | 12 | (31.5%) | 12 | (35.3%) |  |
| Surgery |  |  |  |  |  |  | 0.450 |
|  | Laparotomy |  | 33 | (86.8%) | 32 | (94.1%) |  |
|  | Laparoscopy |  | 4 | (10.5%) | 1 | (2.9%) |  |
|  | robot |  | 1 | (2.6%) | 1 | (2.9%) |  |
| Treatment | |  |  |  |  |  | 0.744 |
|  | Simple hysterectomy±BSO+RPLD | | 24 | (63.2%) | 21 | (61.8%) |  |
|  | Semi-Radical hysterectomy±BSO±RPLD | | 8 | (21.1%) | 8 | (23.5%) |  |
|  | Radical hysterectomy±BSO±RPLD | | 6 | (15.8%) | 5 | (14.7%) |  |
| Lymph node metastases by histology | | |  |  |  |  |  |
|  | Pelvis | Yes | 1 | (2.6%) | 6 | (17.6%) | 0.047 |
|  |  | No | 37 | (97.4%) | 28 | (82.4%) |  |
|  | Para-aorta | Yes | 4 | (10.5%) | 8 | (23.5%) | 0.206 |
|  |  | No | 34 | (89.5%) | 26 | (76.5%) |  |
| Lymph node metastases suspected by computed tomography | | | |  |  |  |  |
|  | Pelvis | Yes | 1 | (2.6%) | 5 | (14.7%) | 0.094 |
|  |  | No | 37 | (97.4%) | 29 | (85.3%) |  |
|  | Para-aorta | Yes | 3 | (7.9%) | 4 | (11.8%) | 0.700 |
|  |  | No | 35 | (92.1%) | 30 | (88.2%) |  |
| Adjuvant therapy | |  |  |  |  |  | 0.218 |
|  | Yes |  | 32 | (84.2%) | 33 | (2.9%) |  |
|  | No |  | 6 | (15.8%) | 1 | (97.1%) |  |
| *All data were indicated in median value. Diseases were classified according to the FIGO staging system of †2018,‡2020 and §2018. Abbreviation: BMI, body mass index; BSO, bilateral salpingo-oophorectomy; RPLD, retroperitoneal lymphadenectomy | | | | | | | |
