# Supplementary material for: The potential of preoperative three-dimensional computed tomography for para-aortic lymphadenectomy in gynecological malignancies
Source: Research Square preprint supplement (doi:10.21203/rs.3.rs-5872015/v1), 2025-02-03
Supplement: Supplementary file 4 [file a24ee3556ed20a4285a7c332.docx]

| Table 2. The overall having variation of renal vessels detected by 3DCT prior to gynecological oncologic surgery | | | | | | |
| --- | --- | --- | --- | --- | --- | --- |
| Case | The number of renal vessels | | | | Urinary tract variations | The details of the variations |
| Right | | Left | |
| Renal artery | Renal vein | Renal artery | Renal vein |
| 1 | 1 | 2 | 1 | 1 |  |  |
| 2 (Fig.2a) | 1 | 1 | 1 | 1 | Rt. double renal pelvis and ureter |  |
| 3 (Fig.2b) | 5 | 3 | 4 | 1 |  | Of the five right renal arteries, the three caudal arteries branch from the L3-4 lumbar vertebrae. Of the two left renal arteries, the caudal artery branches from the L3 lumbar vertebrae. |
| 4 | 2 | 1 | 1 | 1 |  |  |
| 5 | 1 | 2 | 1 | 1 |  |  |
| 6 | 1 | 3 | 1 | 1 |  |  |
| 7 | 1 | 2 | 1 | 1 |  | The right renal vein flows into the IVC immediately after the two veins have merged. |
| 8 | 1 | 3 | 1 | 1 |  |  |
| 9 | 2 | 1 | 1 | 1 |  | The right renal artery branches into the two arteries immediately following its origin. |
| 10 (Fig.2c) | 3 | 1 | 3 | 1 |  | The three each bilateral renal arteries branch off from the abdominal aorta. |
| 11 (Fig.2d) | 2 | 1 | 2 | 1 |  | The two each bilateral renal arteries branch off from the abdominal aorta. |
| 12 (Fig.2e) | 1 | 1 | 3 | 1 |  | The three left renal arteries branch off from the abdominal aorta. |
| 13 | 1 | 1 | 2 | 1 |  | The left two renal arteries originate at L2. |
| 14 (Fig.2f) | 2 | 1 | 1 | 1 |  |  |
| 15 (Fig.2g) | 1 | 2 | 1 | 1 | Lt. double renal pelvis and ureter |  |
| Abbreviation: 3DCT, three-dimensional computed tomography; L, lumbar | | | | | | |
